# Supplementary material for: Exploring the potential of newly synthesized 4-methyl-6-morpholino-pyrimidine derivatives as antiproliferative agents
Source: Royal Society of Chemistry journal article supplement (doi:10.1039/c7nj04157h), 2018-01-01
Supplement: c7nj04157h1.pdf [file c7nj04157h1.pdf]

## Exploring the potential of newly synthesized 4-methyl-6-morpholino-pyrimidine derivatives as antiproliferative agents

Supreet Gaonkar<sup>a,1</sup>, Mohammed Azharuddin Savanur<sup>b,c,1</sup>, Manjunath G. Sunagar<sup>a</sup>, Bijesh Puthusseri<sup>d</sup>, Narahari Deshapande<sup>a</sup>, Afra A. Nadaf<sup>a</sup>, Imtiyaz Ahmed M. Khazi<sup>a,\*</sup>

<sup>a</sup> Department of Studies in Chemistry, Karnatak University, Dharwad 580003, Karnataka, India.

<sup>b</sup> Department of Biochemistry, Karnatak University, Dharwad 580003, Karnataka, India.

<sup>c</sup> Present Address: Indian Institute of Science, Bangalore 560012, India.

<sup>d</sup> Department of Biochemistry and Nutrition, CSIR-Central, Food Technological Research Institute, Mysore 570020, India.

<sup>1</sup> These authors contributed equally to this work

\* Corresponding author, Imtiyaz Ahmed M. Khazi; Email: [drimkorgchem@gmail.com](mailto:drimkorgchem@gmail.com)

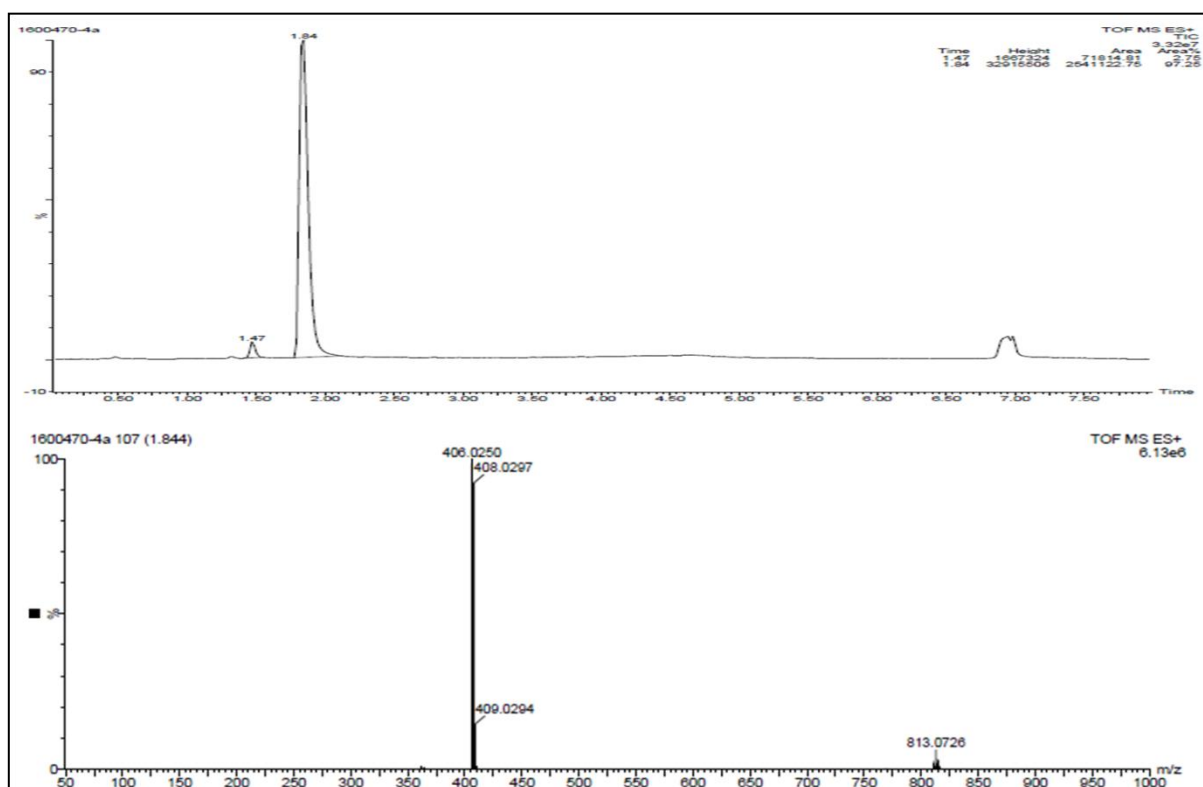

LC-MS of compound 4a

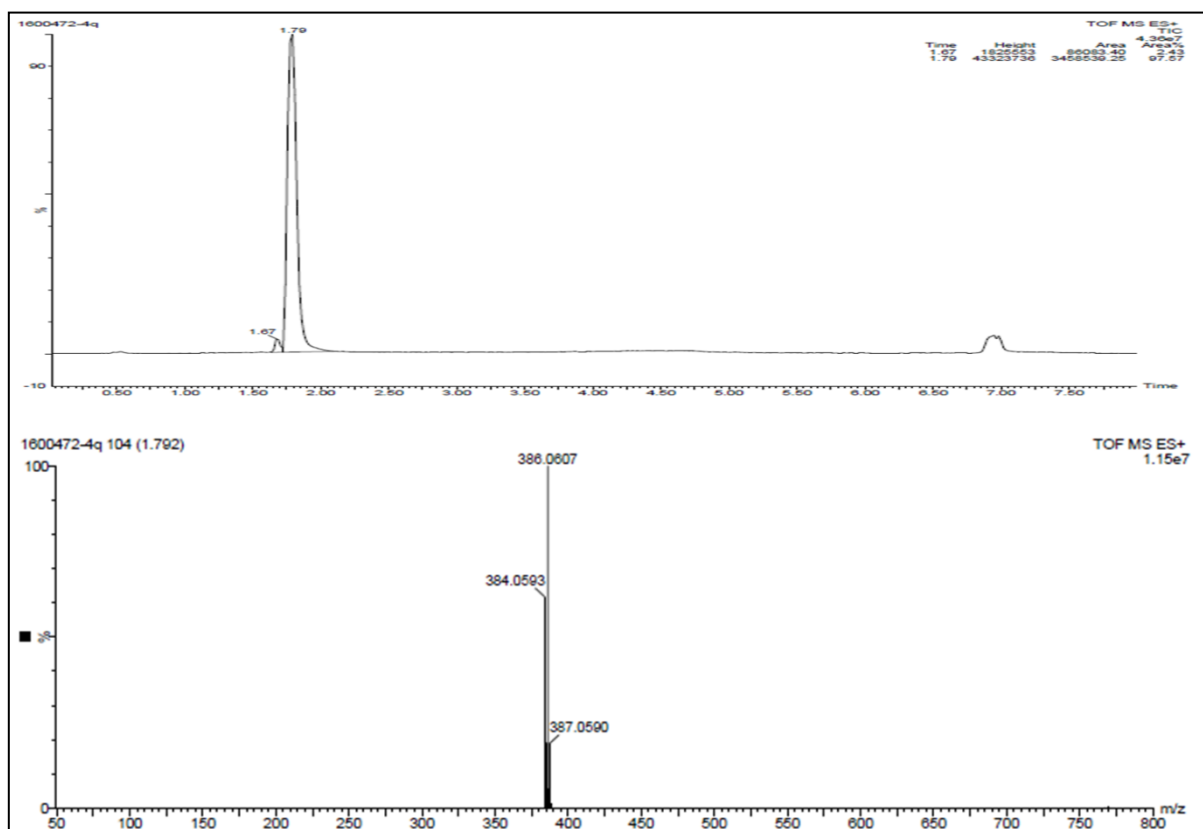

LC-MS of compound 4g

**KARNATAK UNIVERSITY  
UNIVERSITY SCIENCE INSTRUMENTS CENTRE  
DHARWAD**

Sample Information

Analyzed by : Admin  
Analyzed : 5/6/2016 1:43:05 PM  
Sample Type : Unknown  
Level # : 1  
Sample Name : 4e  
Sample ID :  
IS Amount : [1]=1

Spectrum

Line#:1 R.Time:0.0(Scan#:4)  
MassPeaks:353  
RawMode:Single 0.0(4) BasePeak:299(5910753)  
BG Mode:None Group 1 - Event 1

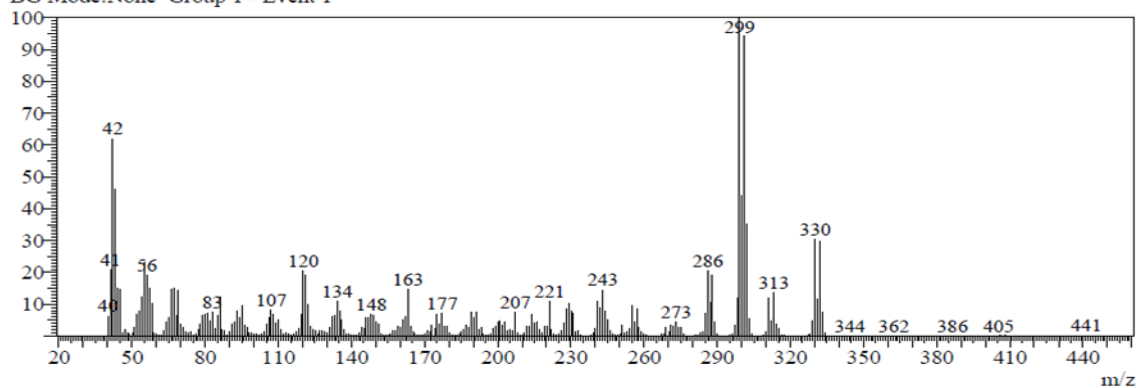

**GC-MS of compound 4e**

**KARNATAK UNIVERSITY  
UNIVERSITY SCIENCE INSTRUMENTS CENTRE  
DHARWAD**

Sample Information

Analyzed by : Admin  
Analyzed : 5/6/2016 1:27:22 PM  
Sample Type : Unknown  
Level # : 1  
Sample Name : 4h  
Sample ID :  
IS Amount : [1]=1

Spectrum

Line#:1 R.Time:4.7(Scan#:563)  
MassPeaks:334  
RawMode:Single 4.7(563) BasePeak:285(1616146)  
BG Mode:None Group 1 - Event 1

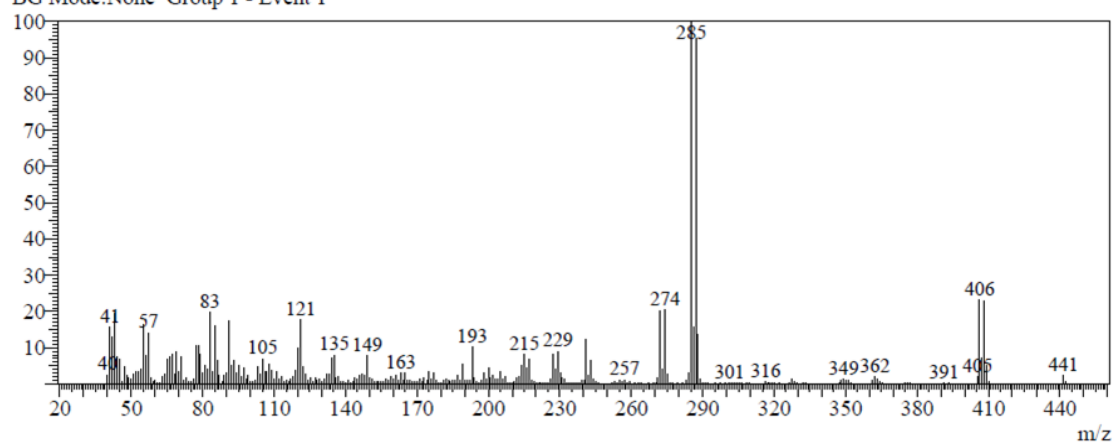

**GC-MS of compound 4h**

**KARNATAK UNIVERSITY  
UNIVERSITY SCIENCE INSTRUMENTS CENTRE  
DHARWAD**

Sample Information:

Analyzed by : Admin  
Analyzed : 5/5/2016 3:50:21 PM  
Sample Type : Unknown  
Level # : 1  
Sample Name : 5e  
Sample ID :  
IS Amount : [1]=1

Spectrum

Line#:1 R.Time:0.7(Scan#:90)  
MassPeaks:111  
RawMode:Single 0.7(90) BasePeak:43(106719)  
BG Mode:None Group 1 - Event 1

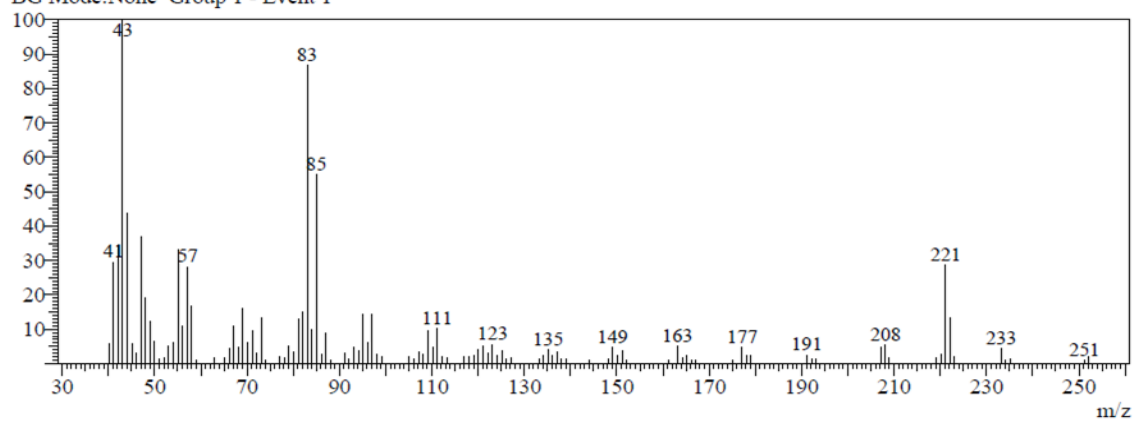

**GC-MS of compound 5e**

**KARNATAK UNIVERSITY  
UNIVERSITY SCIENCE INSTRUMENTS CENTRE  
DHARWAD**

Sample Information

Analyzed by : Admin  
Analyzed : 5/5/2016 3:58:30 PM  
Sample Type : Unknown  
Level # : 1  
Sample Name : 5h  
Sample ID :  
IS Amount : [1]=1

Spectrum

Line#:1 R.Time:0.5(Scan#:63)  
MassPeaks:208  
RawMode:Single 0.5(63) BasePeak:207(1959820)  
BG Mode:None Group 1 - Event 1

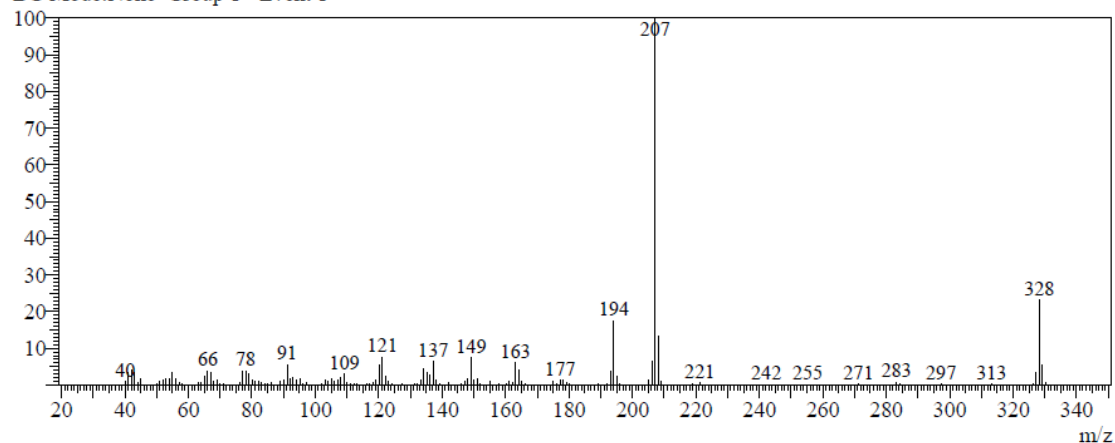

**GC-MS of compound 5h**

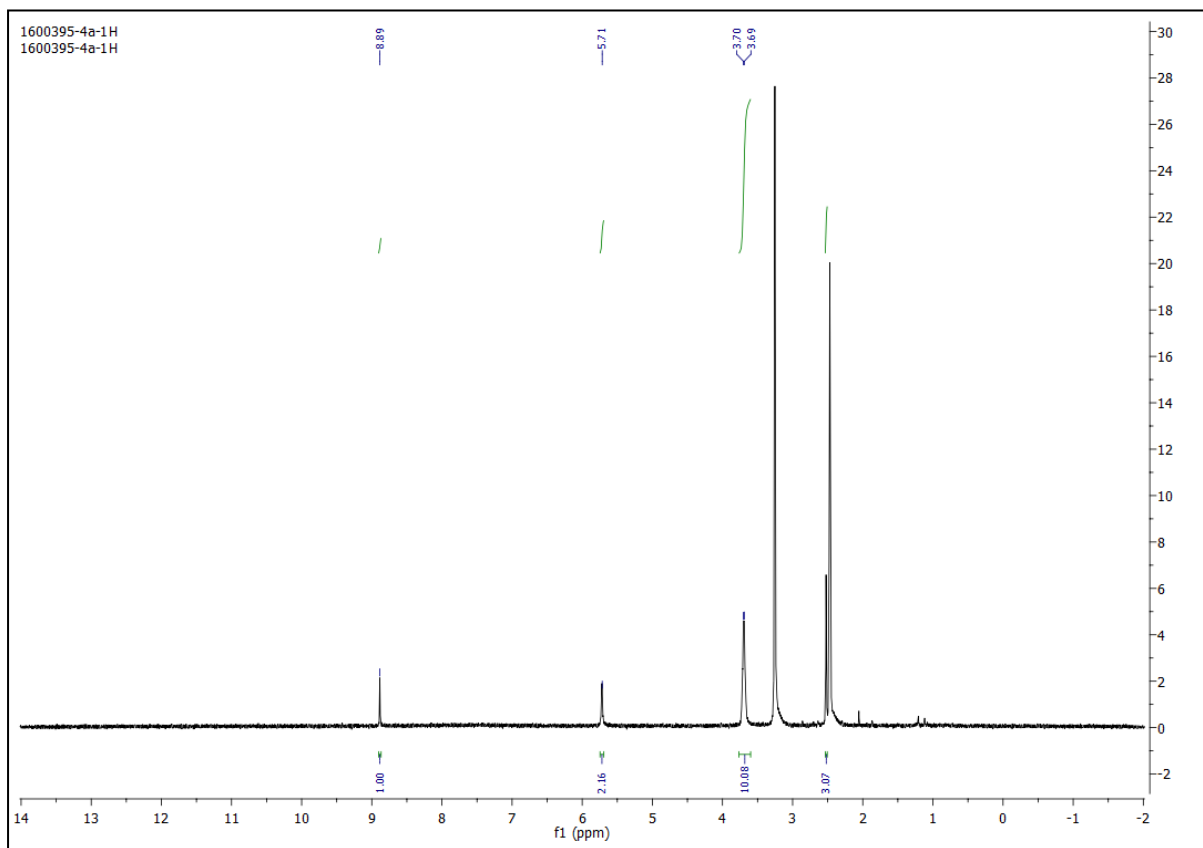

**$^1\text{H}$  NMR (400 MHz) Spectrum of compound 4a in dms0-d<sub>6</sub>**



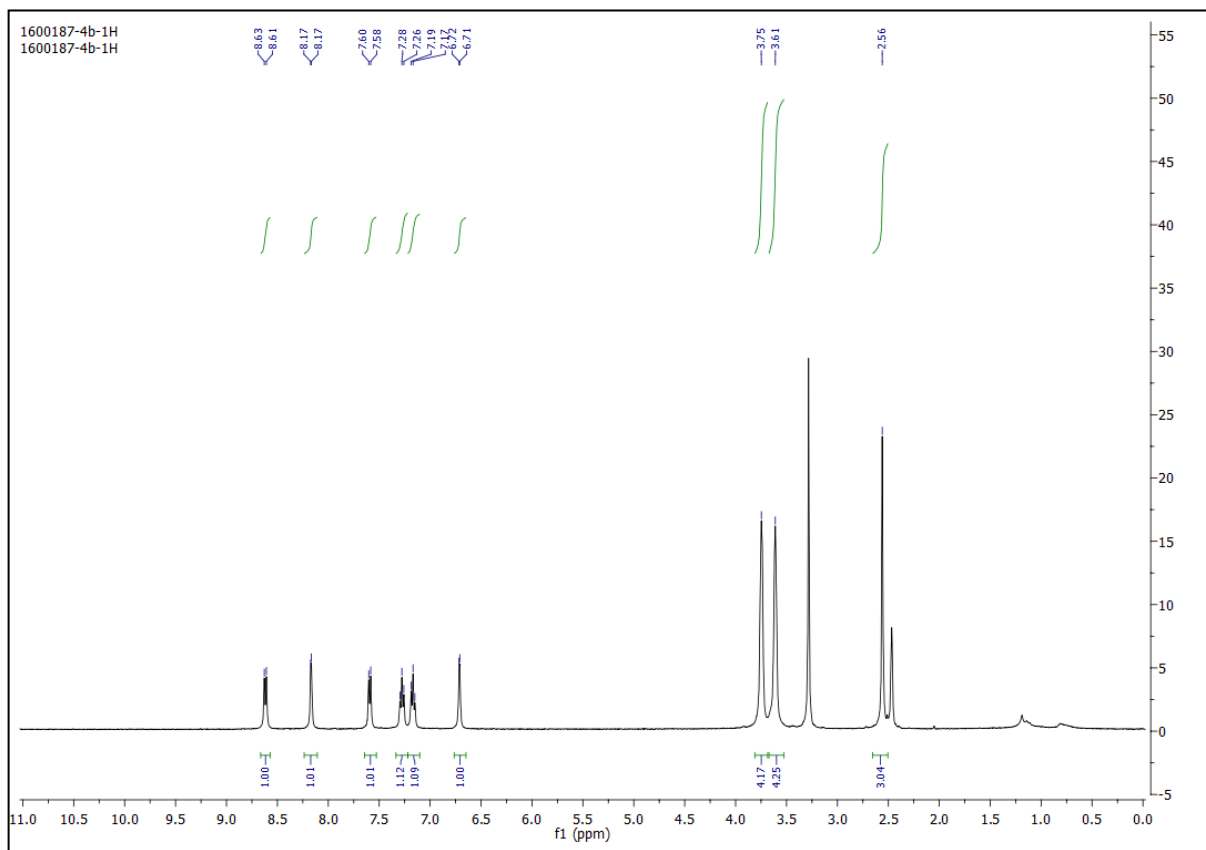

**$^1\text{H}$  NMR (400 MHz) Spectrum of compound 4b in dms0-d<sub>6</sub>**

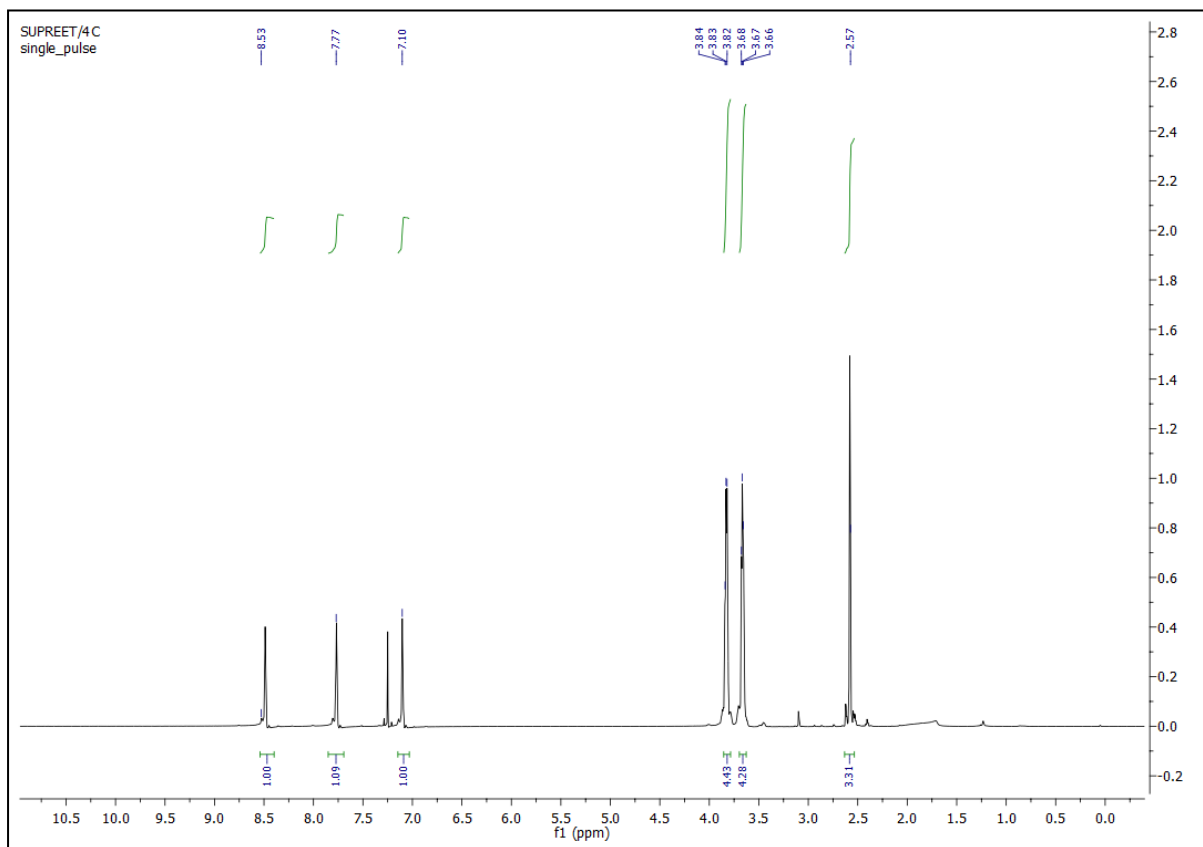

**$^1\text{H}$  NMR (400 MHz) Spectrum of compound 4c in  $\text{CDCl}_3$**

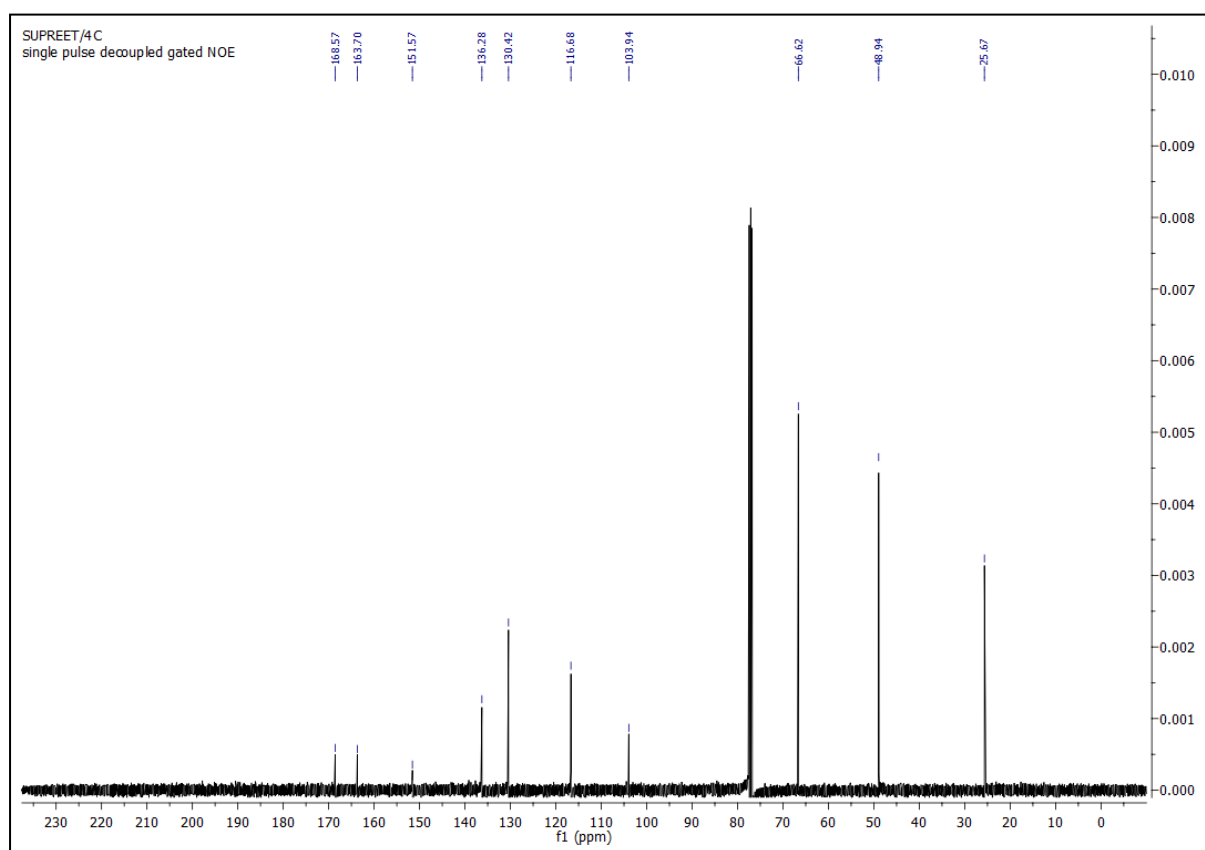

**$^{13}\text{C}$  NMR (100 MHz) Spectrum of compound 4c in  $\text{CDCl}_3$**

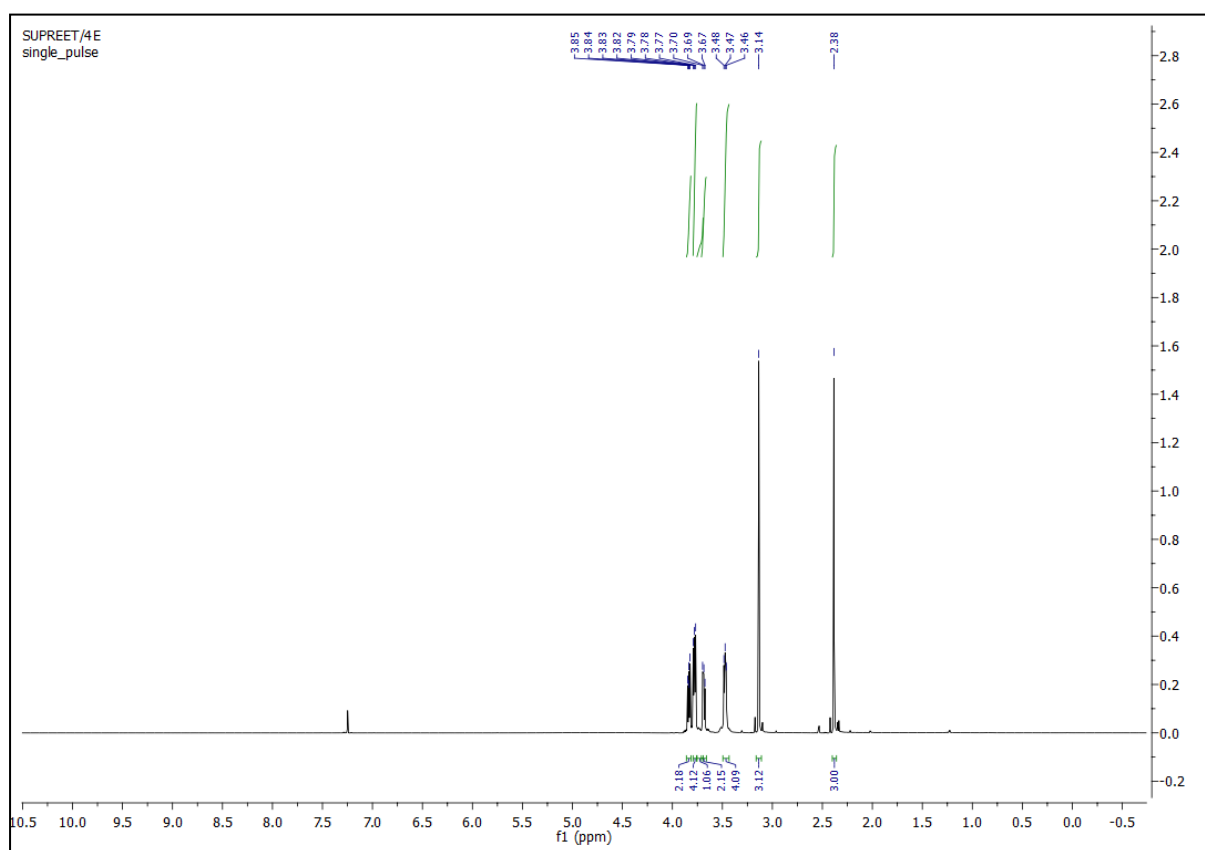

**$^1\text{H}$  NMR (400 MHz) Spectrum of compound 4e in  $\text{CDCl}_3$**

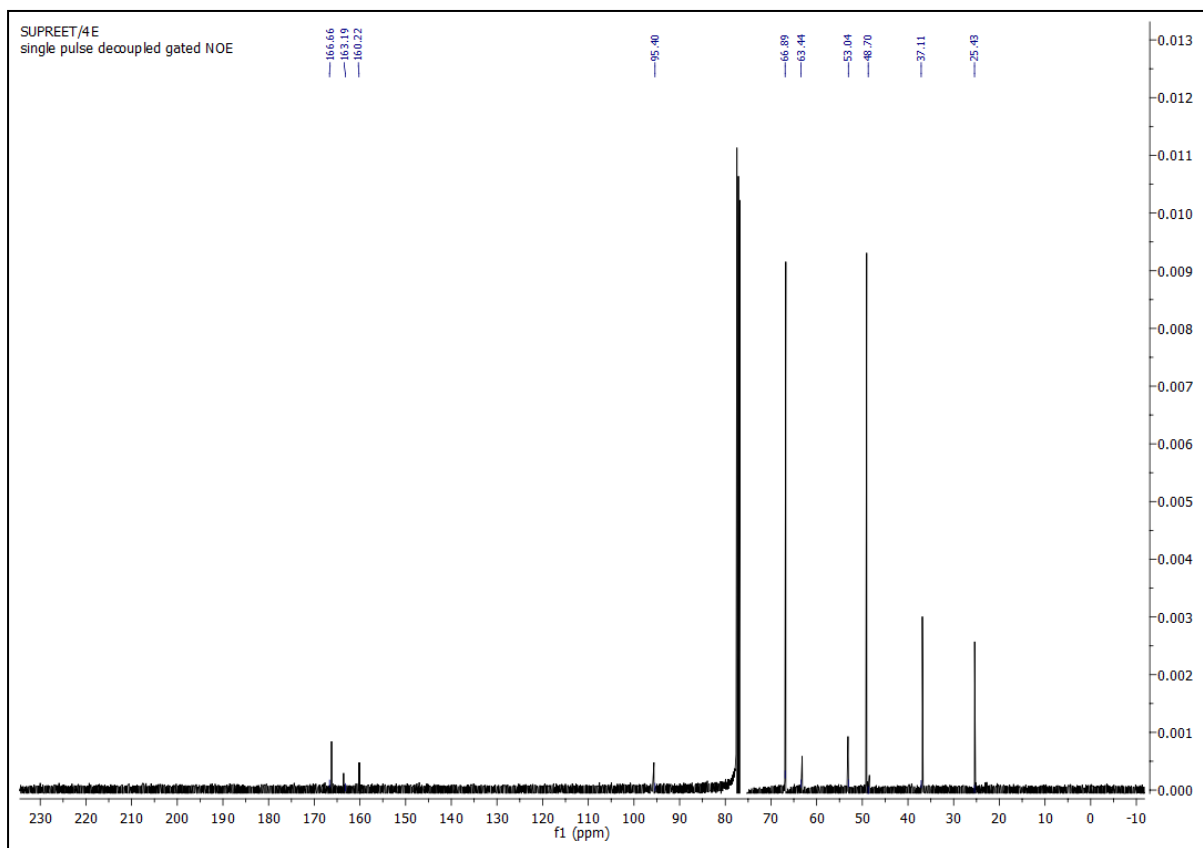

**$^{13}\text{C}$  NMR (100 MHz) Spectrum of compound 4e in  $\text{CDCl}_3$**

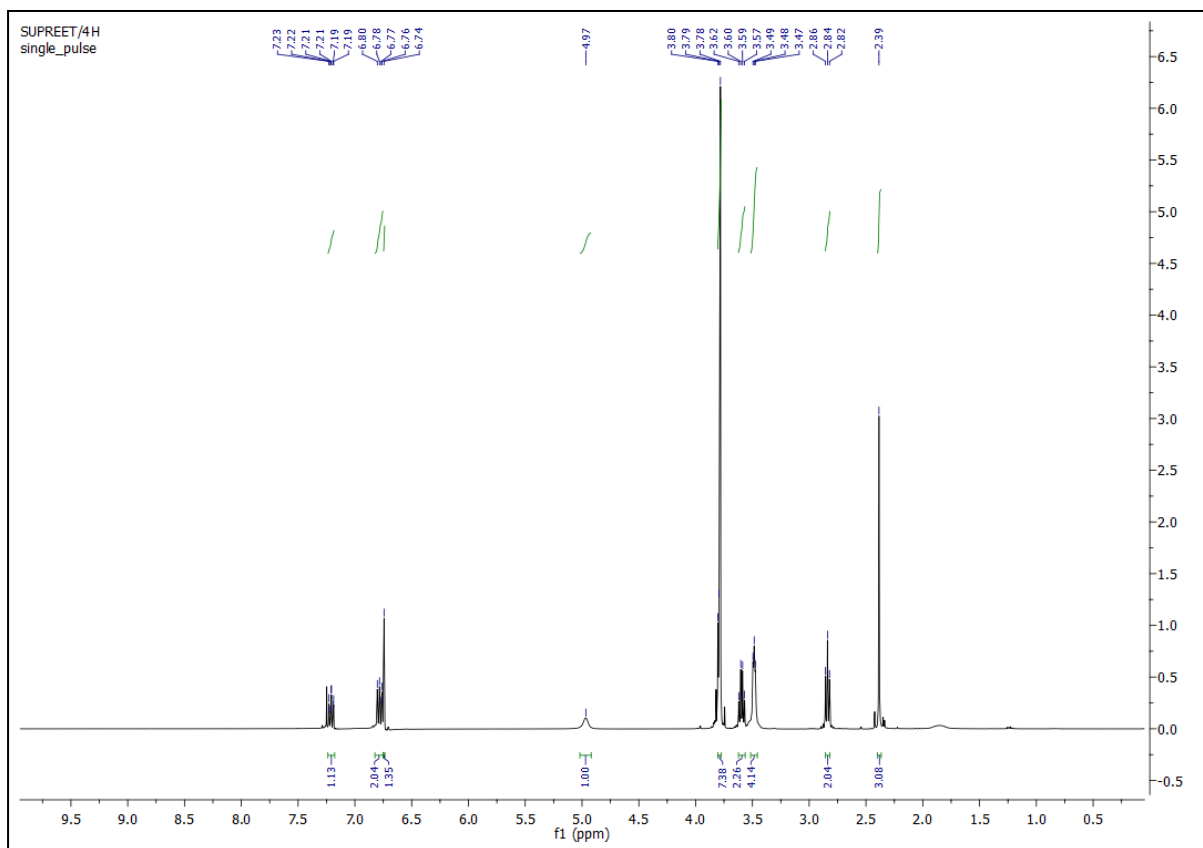

**$^1\text{H}$  NMR (400 MHz) Spectrum of compound 4h in  $\text{CDCl}_3$**

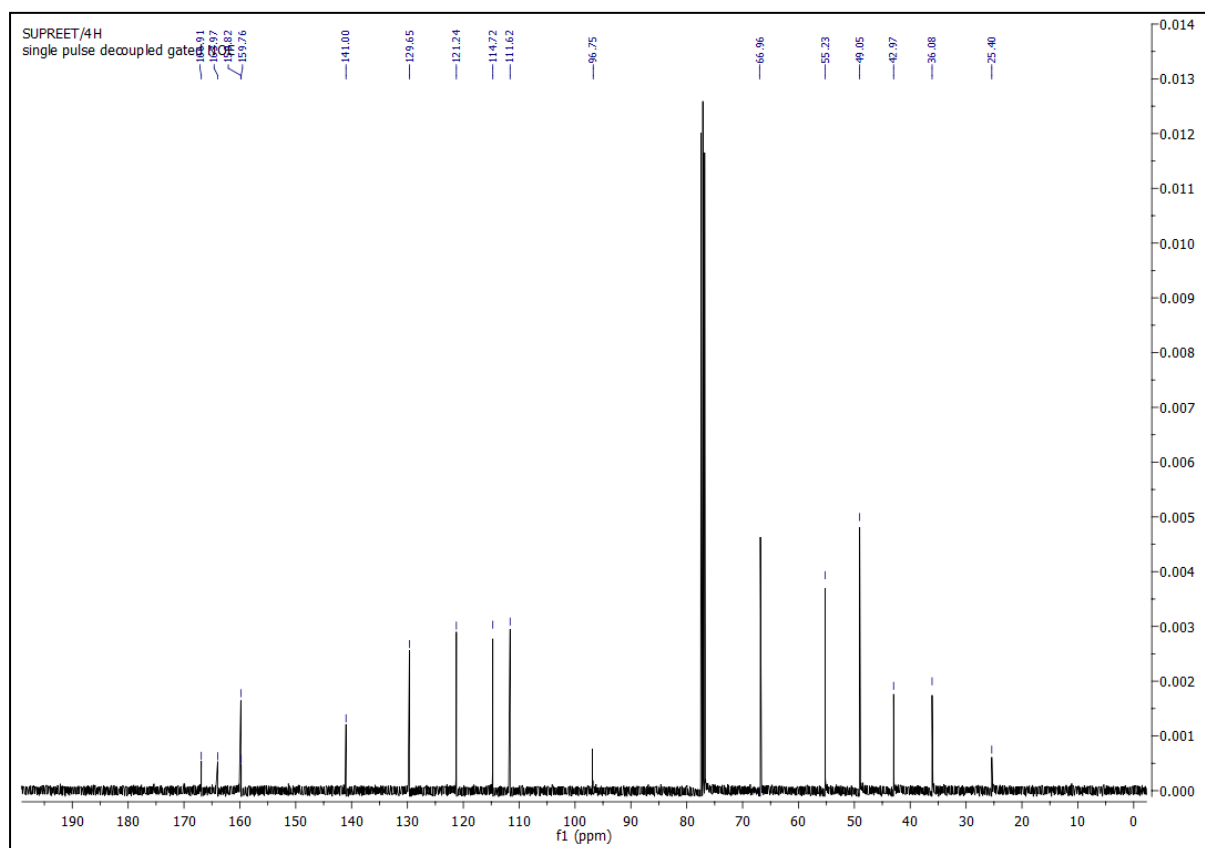

**$^{13}\text{C}$  NMR (100 MHz) Spectrum of compound 4h in  $\text{CDCl}_3$**

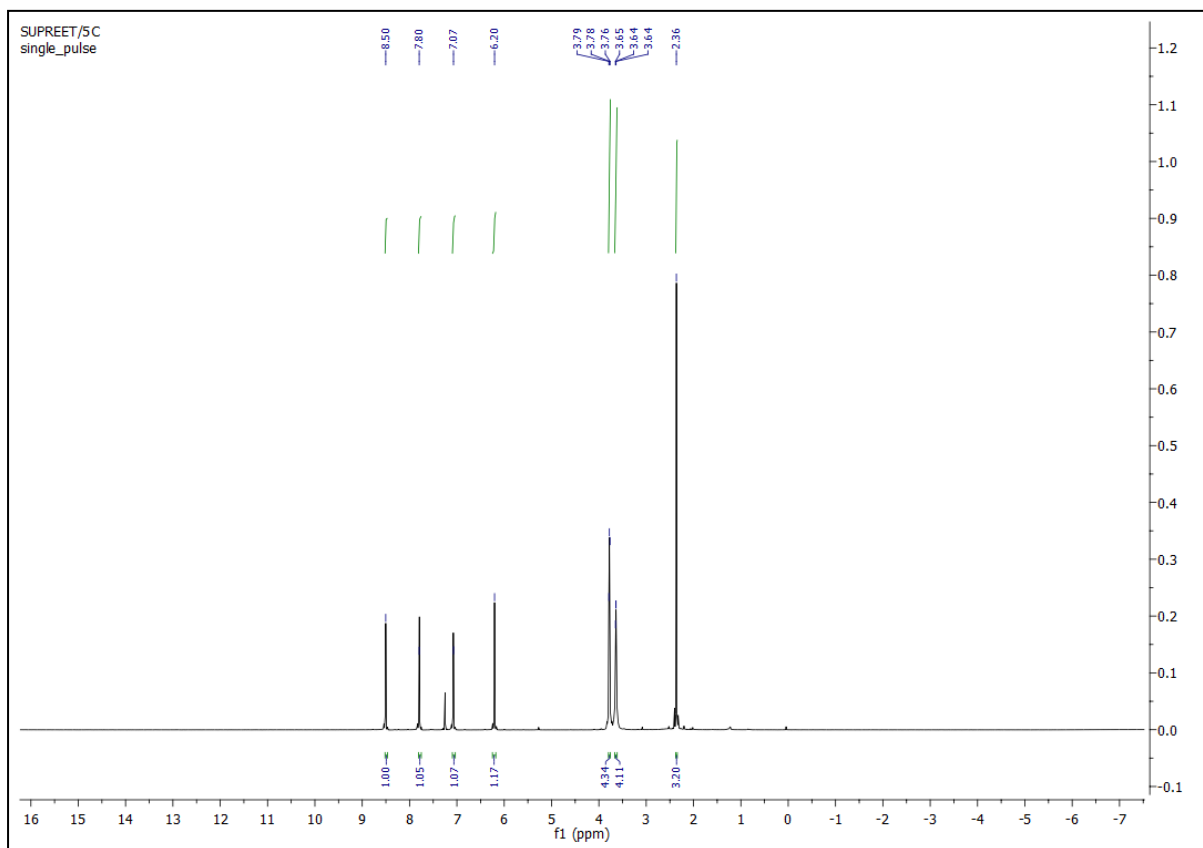

**$^1\text{H}$  NMR (400 MHz) Spectrum of compound 5c in  $\text{CDCl}_3$**



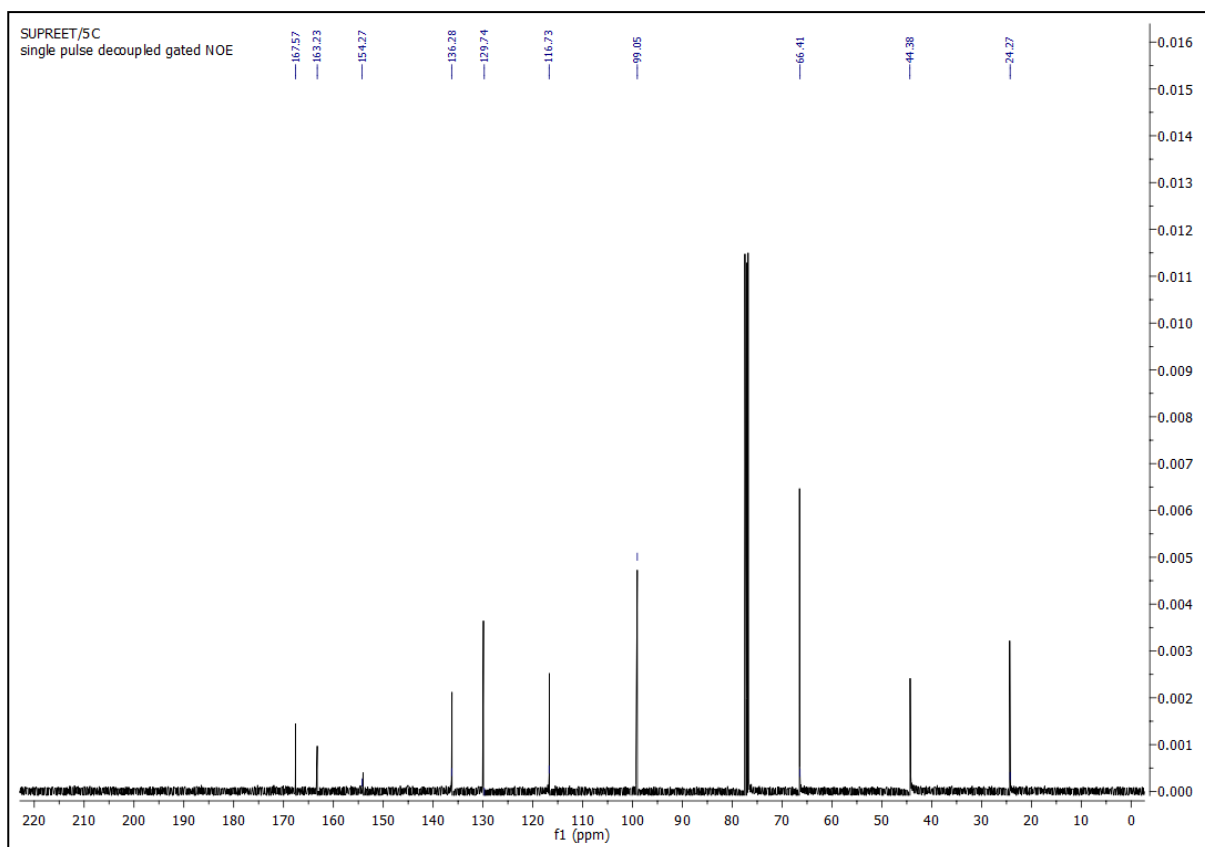

**$^{13}\text{C}$  NMR (100 MHz) Spectrum of compound 5c in  $\text{CDCl}_3$**

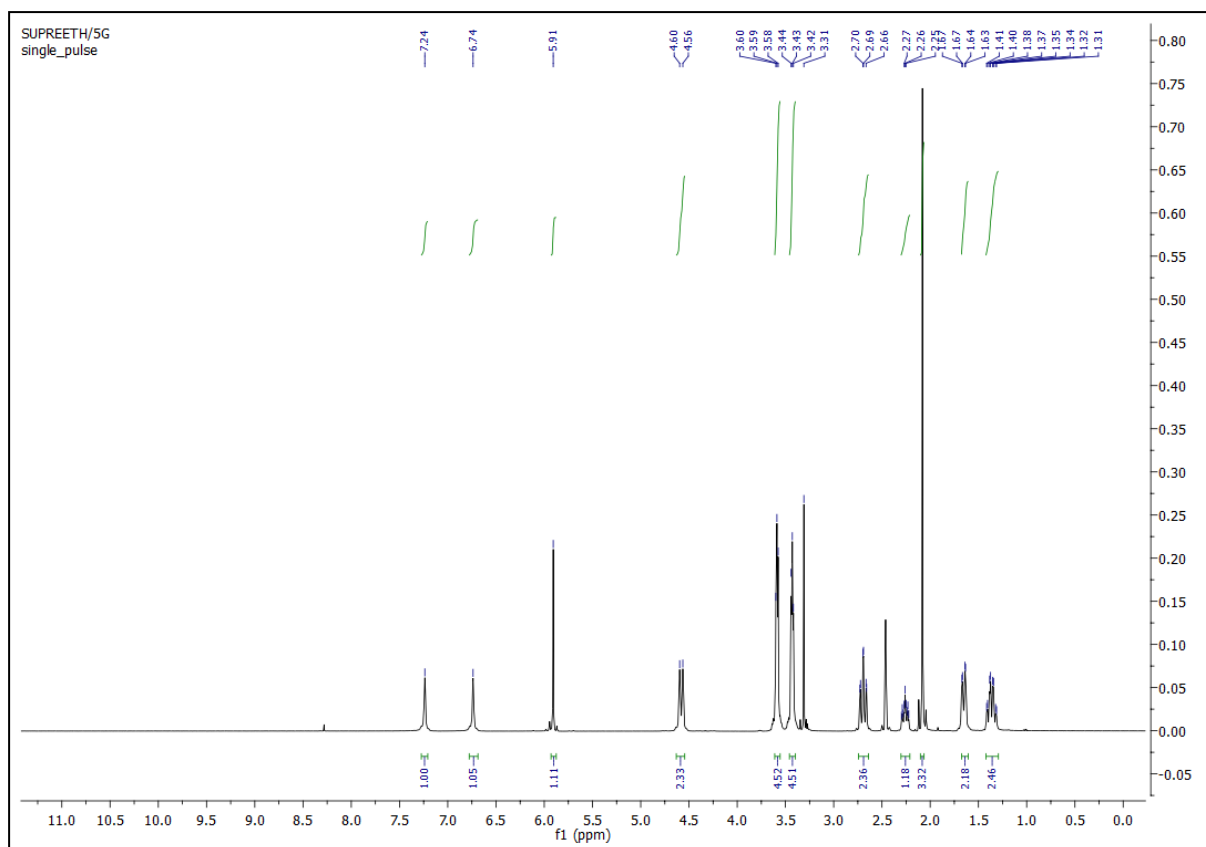

**$^1\text{H}$  NMR (400 MHz) Spectrum of compound 5g in  $\text{dms}\text{-d}_6$**

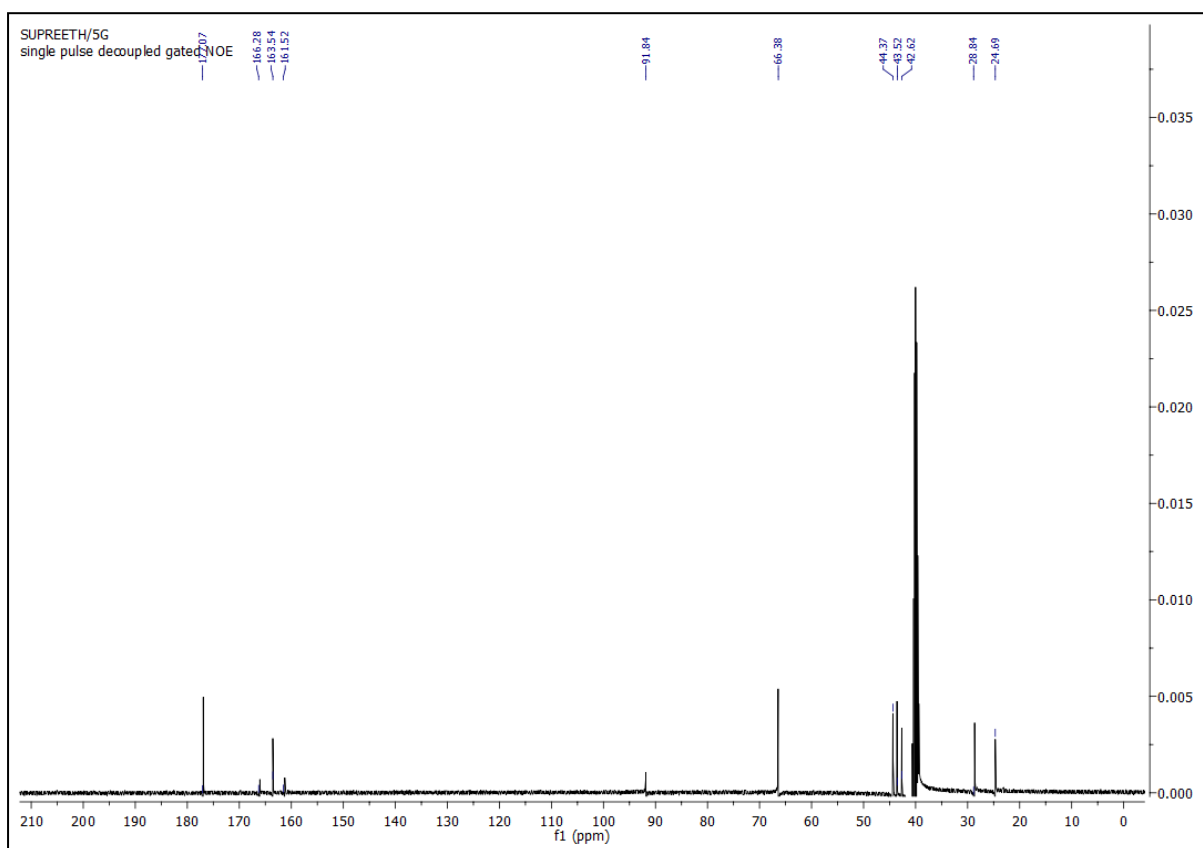

**$^{13}\text{C}$  NMR (100 MHz) Spectrum of compound 5g in dms0-d<sub>6</sub>**
